# Supplementary material for: Assembling novel Cd(ii) complexes with multidentate nitrogen donor ligands obtained in situ from the system: zerovalent copper, cadmium oxide, 1-hydroxymethyl-3,5-dimethylpyrazole and ammonium thiocyanate
Source: Royal Society of Chemistry journal article supplement (doi:10.1039/c3dt32987a), 2013-01-01
Supplement: c3dt32987a.pdf [file c3dt32987a.pdf]

Supporting Information to

*Assembling novel Cd(II) complexes with the ligands with multidentate nitrogen donors  
 obtained in situ from the system: zerovalent copper, cadmium oxide, 1-hydroxymethyl-3,5-  
 dimethylpyrazole and ammonia salt*

Barbara Barszcz,<sup>\*a</sup> Joanna Masternak,<sup>a</sup> Wanda Sawka-Dobrowolska,<sup>b</sup>

Table of Contents

Selected angles (°) for complexes **1**, **2**.....Table 1  
 Selected short contacts and C-H···π type interactions in the crystal structure of complexes **1**, **2**  
 (Å and °).....Table 2  
 Short contacts presented in the crystal structures S1-S2

**Table 1** Selected angles (°) for **1**, **2**.

| <b>1</b>                      |           | <b>2</b>       |           |
|-------------------------------|-----------|----------------|-----------|
| S(1)-Cd(1)-S(1) <sup>I</sup>  | 180.0     | N(4)-Cd-N(13)  | 107.63(1) |
| N(4)-Cd(1)-N(4) <sup>I</sup>  | 180.0     | N(4)-Cd-N(5)   | 99.78(1)  |
| N(1)-Cd(1)-N(1) <sup>I</sup>  | 180.00(5) | N(13)-Cd-N(5)  | 86.34(9)  |
| N(4)-Cd(1)-N(1)               | 87.44(4)  | N(4)-Cd-N(1)   | 111.75(1) |
| N(4)-Cd(1)-N(1) <sup>I</sup>  | 92.56(4)  | N(13)-Cd-N(1)  | 140.62(9) |
| N(4)-Cd(1)-S(1) <sup>I</sup>  | 86.12(3)  | N(5)-Cd-N(1)   | 86.88(9)  |
| N(4)-Cd(1)-S(1)               | 93.88(3)  | N(4)-Cd-N(11)  | 102.87(1) |
| N(1)-Cd(1)-S(1) <sup>I</sup>  | 89.87(3)  | N(13)-Cd-N(11) | 91.10(9)  |
| N(1)-Cd(1)-S(1)               | 90.13(3)  | N(5)-Cd-N(11)  | 156.89(1) |
| N(3)-Cd(2)-N(3) <sup>II</sup> | 169.25(7) | N(1)-Cd-N(11)  | 80.59(9)  |
| N(3)-Cd(2)-O(1) <sup>II</sup> | 89.87(4)  | N(4)-Cd-N(3)   | 175.89(9) |
| N(3)-Cd(2)-O(1)               | 82.25(4)  | N(13)-Cd-N(3)  | 69.91(8)  |
| O(1)-Cd(2)-O(1) <sup>II</sup> | 85.83(7)  | N(5)-Cd-N(3)   | 83.46(9)  |
| N(3)-Cd(2)-S(2) <sup>II</sup> | 92.30(4)  | N(1)-Cd-N(3)   | 70.79(8)  |
| N(3)-Cd(2)-S(2)               | 95.35(3)  | N(11)-Cd-N(3)  | 74.12(8)  |
| O(1)-Cd(2)-S(2)               | 177.08(3) |                |           |
| O(1)-Cd(2)-S(2) <sup>II</sup> | 92.52(3)  |                |           |
| S(2)-Cd(2)-S(2) <sup>II</sup> | 89.227(2) |                |           |

Symmetry transformations used to generate equivalent atoms: (1)<sup>I</sup>-x-1, -y+2, -z, <sup>II</sup>-x, y, -z+1/2;

**Table 2** Selected short contacts and C-H···π type interactions in the crystal structure of complexes **1**, **2** (Å and °).

| Compound | D-H···A                                 | d(D-H) (Å)           | d(H···A) (Å) | d(D···A) (Å) | <(DH···A) (°) |
|----------|-----------------------------------------|----------------------|--------------|--------------|---------------|
| <b>1</b> | O(1)-H(1)···N(2) <sup>I</sup>           | 0.74                 | 2.09         | 2.818        | 169.6         |
|          | C(1)-H(11)···S(1) <sup>II</sup>         | 0.92                 | 2.84         | 3.580        | 137.4         |
|          | C(2)-H(2)···S(1) <sup>II</sup>          | 0.92                 | 2.99         | 3.842        | 154.8         |
| <b>2</b> | C(13)-H(133)···N(1) <sup>I</sup>        | 0.96                 | 2.68         | 3.592        | 172.3         |
|          | C(13)-H(133)···N(2) <sup>I</sup>        | 0.96                 | 2.68         | 3.534        | 147.8         |
|          | C(16)-H(161)···S(2) <sup>II</sup>       | 0.97                 | 2.99         | 3.693        | 106.4         |
|          | C(17)-H(172)···S(2) <sup>III</sup>      | 0.97                 | 2.94         | 3.416        | 111.5         |
|          | C(18)-H(182)···S(2) <sup>II</sup>       | 0.97                 | 2.79         | 3.610        | 142.8         |
|          | C(25)-H(253)···S(1) <sup>II</sup>       | 0.96                 | 2.99         | 3.947        | 174.5         |
|          | D-H···A                                 | d <sub>π,H</sub> (Å) | θ (°)        | α (°)        | d (Å)         |
| <b>2</b> | C(33)-H(133)···C(5) <sup>I</sup>        | 2.61                 | 93           | 147          | 0.13          |
|          | C(35)-<br>H(351)···C(33) <sup>III</sup> | 2.58                 | 69           | 143          | 0.92          |

Symmetry transformations used to generate equivalent atoms: (1)<sup>I</sup>-x, y-1, -z+1/2; <sup>II</sup>x, -y+2, z-1/2;  
 (2)<sup>I</sup>x, y+1, z; <sup>II</sup>x+1, y, z; <sup>III</sup>-x, -y, -z+1;

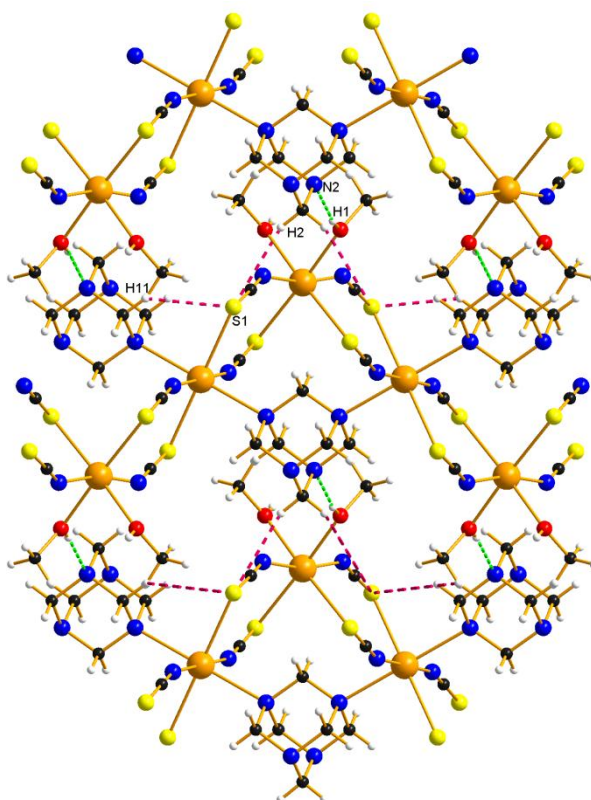

**Fig. S1** Perspective view of the 3D network (**4**) with hydrogen bonding interactions O-H...N (green) and C-H...S (wine-cloured) types.

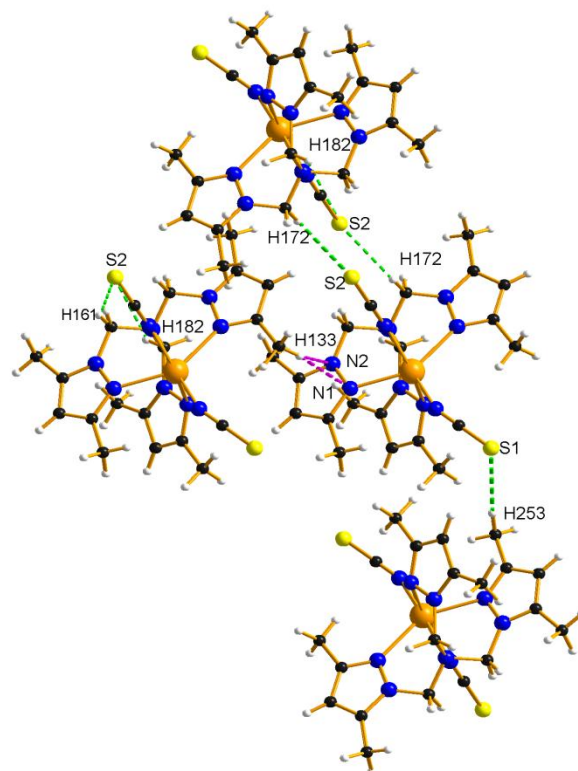

**Fig. S2** Perspective view (along c axis) of **5** that emphasizes the intramolecular hydrogen-bonding interaction, C-H...S (green), C-H...N (wine-coloured) type.
